# Supplementary material
Source: MDPI journal article supplement (https://www.mdpi.com/search?q=coatings-07-00232)

## Supplementary Materials

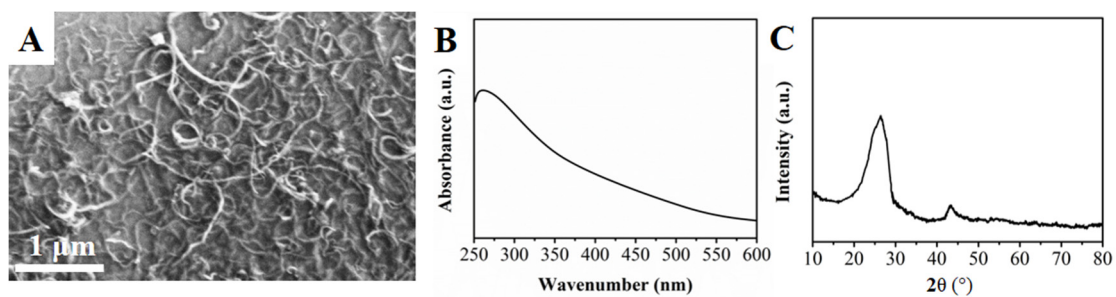

Figure S1. (A) SEM image, (B) UV-Vis spectrum and (C) XRD pattern of MWCNTs.

Supplement: s001 [file coatings-07-00232-s001.pdf]
